# Supplementary material for: Prediction of the effective force on DNA in a nanopore based on density functional theory
Source: Royal Society of Chemistry journal article supplement (doi:10.1039/c3ra43325k), 2013-01-01
Supplement: c3ra43325k.pdf [file c3ra43325k.pdf]

## Supplement

The grand potential of the present model is expressed in eq.(2) of the manuscript as a functional of Helmholtz energy for density profile of certain species, in which the ideal gas contribution is written as

$$F^{id}[\{\rho_i\}] = k_B T \sum_i \int d\mathbf{r} \rho_i(\mathbf{r}) \left[ \ln(\rho_i(\mathbf{r}) \lambda_i^3 - 1) \right] \quad (S1)$$

where  $\lambda_i$  is the de Broglie wavelength. The direct Coulomb contribution is given by

$$F_C^{ex}[\{\rho_i\}] = \frac{1}{2} \iint d\mathbf{r}_1 d\mathbf{r}_2 \sum_{i,j} \frac{z_i z_j e^2 \rho_i(\mathbf{r}_1) \rho_j(\mathbf{r}_2)}{\varepsilon \varepsilon_0 |\mathbf{r}_1 - \mathbf{r}_2|} \quad (S2)$$

The excluded volume term,  $F_{hs}^{ex}$ , is calculated according to MFMT,

$$F_{hs}^{ex} = k_B T \int d\mathbf{r} \left[ -n_0 \ln(1 - n_3) + \frac{n_1 n_2 - \mathbf{n}_{V1} \cdot \mathbf{n}_{V2}}{1 - n_3} + \frac{n_2^3 \ln(1 - n_3) - 3n_2 \mathbf{n}_{V2} \cdot \mathbf{n}_{V2} \ln(1 - n_3)}{36\pi n_3^2} + \frac{n_2^3 - 3n_2 \mathbf{n}_{V2} \cdot \mathbf{n}_{V2}}{36\pi n_3 (1 - n_3)^2} \right] \quad (S3)$$

where  $n_i$ ,  $i = 0, 1, 2, 3$  and  $n_{Vj}$  ( $j = 1, 2$ ) are scalar and vector total weighted densities respectively.

The detail definitions for the weighted densities are given in Ref.17.  $F_{ele}^{ex}$  is derived from a truncated second-order functional Taylor expansion around the corresponding bulk fluid, which is given by

$$F_{ele}^{ex} = F_{ele}^{ex}(\{\rho_i^b\}) + \sum_i \int d\mathbf{r} \frac{\delta F_{ele}^{ex}}{\delta \rho_i(\mathbf{r})} \Delta \rho_i(\mathbf{r}) + \frac{1}{2} \sum_{i,j} \iint d\mathbf{r} d\mathbf{r}' \frac{\delta^2 F_{ele}^{ex}}{\delta \rho_i(\mathbf{r}) \rho_j(\mathbf{r})} \Delta \rho_j(\mathbf{r}) \Delta \rho_j(\mathbf{r}') \quad (S4)$$

where  $\Delta \rho_i(\mathbf{r}) = \rho_i(\mathbf{r}) - \rho_i^b$ , and  $\{\rho_i^b\}$  is the bulk density of species  $i$ . The first-order and second-order direct correlation functions are defined as,

$$k_B T \Delta C_i^{(1)}(\mathbf{r}) = -\delta F_{ele}^{ex} / \delta \rho_i(\mathbf{r}) \quad (S5)$$

$$k_B T \Delta C_{ij}^{(2)}(|\mathbf{r} - \mathbf{r}'|) = -\delta^2 F_{ele}^{ex} / \delta \rho_i(\mathbf{r}) \delta \rho_j(\mathbf{r}') \quad (S6)$$

$\Delta C_{ij}^{(2)}(r)$  is obtained from the Ornstein–Zernike integral equation with the MSA [1,2],

$$\Delta C_{ij}^{(2)} = \frac{z_1 z_2 e^2}{\varepsilon \varepsilon_0} \left[ \frac{2B}{d} - \left( \frac{B}{d} \right)^2 s - \frac{1}{s} \right], \quad s = |\mathbf{r} - \mathbf{r}'| \leq d \quad (S7)$$

in which  $B = [y^2 + y - y(1 + 2y)^{1/2}] / y^2$ ,  $y^2 = (4\pi d^2 / \varepsilon \varepsilon_0 k_B T) \sum_i \rho_i^b z_i^2 e^2$ .

- [1] Waisman, E. and J. L. Lebowitz., J. Chem. Phys., 1972, **56**(6): 3086.
- [2] Waisman, E. and J. L. Lebowitz., J. Chem. Phys., 1972, **56**(6): 3093.
